# Supplementary material
Source: PubMed Central journal article supplement (PMC8433268)
Supplement: NIHMS1731647-supplement-Supplemental_Material.pdf [file NIHMS1731647-supplement-Supplemental_Material.pdf]

Table S1. Potential scale reduction (PSR) factors determining mediation model convergence.

| IV: Effect-Enhancement Motives; DV: Number of Consequences |      |
|------------------------------------------------------------|------|
| Iteration                                                  | PSR  |
| 100                                                        | 1.30 |
| 200                                                        | 1.08 |
| 300                                                        | 1.15 |
| 400                                                        | 1.44 |
| 500                                                        | 1.17 |
| 600                                                        | 1.28 |
| 700                                                        | 1.18 |
| 800                                                        | 1.06 |
| 900                                                        | 1.02 |
| 1000                                                       | 1.09 |
| 2000                                                       | 1.05 |
| 4000                                                       | 1.01 |
| 6000                                                       | 1.02 |
| 8000                                                       | 1.02 |
| 10000                                                      | 1.02 |
| IV: Effect-Enhancement Motives; DV: Hangover               |      |
| Iteration                                                  | PSR  |
| 100                                                        | 1.69 |
| 200                                                        | 1.66 |
| 300                                                        | 1.61 |
| 400                                                        | 1.25 |
| 500                                                        | 1.03 |
| 600                                                        | 1.09 |
| 700                                                        | 1.05 |
| 800                                                        | 1.03 |
| 900                                                        | 1.06 |
| 1000                                                       | 1.04 |
| 2000                                                       | 1.04 |
| 4000                                                       | 1.03 |
| 6000                                                       | 1.02 |
| 8000                                                       | 1.02 |
| 10000                                                      | 1.01 |
| IV: Effect-Enhancement Motives; DV: Nausea                 |      |
| Iteration                                                  | PSR  |
| 100                                                        | 1.87 |
| 200                                                        | 1.52 |
| 300                                                        | 1.48 |
| 400                                                        | 1.27 |
| 500                                                        | 1.06 |
| 600                                                        | 1.05 |
| 700                                                        | 1.10 |
| 800                                                        | 1.03 |

|       |      |
|-------|------|
| 900   | 1.02 |
| 1000  | 1.04 |
| 2000  | 1.14 |
| 4000  | 1.10 |
| 6000  | 1.03 |
| 8000  | 1.01 |
| 10000 | 1.01 |

|                                              |
|----------------------------------------------|
| IV: Effect-Enhancement Motives; DV: Blackout |
|----------------------------------------------|

| Iteration | PSR  |
|-----------|------|
| 100       | 1.95 |
| 200       | 1.31 |
| 300       | 1.67 |
| 400       | 2.30 |
| 500       | 1.36 |
| 600       | 1.22 |
| 700       | 1.11 |
| 800       | 1.05 |
| 900       | 1.05 |
| 1000      | 1.09 |
| 2000      | 1.56 |
| 4000      | 1.14 |
| 6000      | 1.07 |
| 8000      | 1.05 |
| 10000     | 1.02 |

|                                                |
|------------------------------------------------|
| IV: Social Motives; DV: Number of Consequences |
|------------------------------------------------|

| Iteration | PSR  |
|-----------|------|
| 100       | 1.31 |
| 200       | 1.06 |
| 300       | 1.15 |
| 400       | 1.44 |
| 500       | 1.17 |
| 600       | 1.28 |
| 700       | 1.18 |
| 800       | 1.06 |
| 900       | 1.02 |
| 1000      | 1.09 |
| 2000      | 1.05 |
| 4000      | 1.01 |
| 6000      | 1.02 |
| 8000      | 1.02 |
| 10000     | 1.02 |

|                                  |
|----------------------------------|
| IV: Social Motives; DV: Hangover |
|----------------------------------|

| Iteration | PSR  |
|-----------|------|
| 100       | 1.70 |
| 200       | 1.66 |
| 300       | 1.58 |

---

|       |      |
|-------|------|
| 400   | 1.26 |
| 500   | 1.03 |
| 600   | 1.09 |
| 700   | 1.05 |
| 800   | 1.03 |
| 900   | 1.06 |
| 1000  | 1.08 |
| 2000  | 1.04 |
| 4000  | 1.03 |
| 6000  | 1.02 |
| 8000  | 1.02 |
| 10000 | 1.01 |

---

IV: Social Motives; DV: Nausea

---

| Iteration | PSR  |
|-----------|------|
| 100       | 1.87 |
| 200       | 1.45 |
| 300       | 1.45 |
| 400       | 1.27 |
| 500       | 1.06 |
| 600       | 1.05 |
| 700       | 1.09 |
| 800       | 1.02 |
| 900       | 1.02 |
| 1000      | 1.06 |
| 2000      | 1.16 |
| 4000      | 1.10 |
| 6000      | 1.03 |
| 8000      | 1.01 |
| 10000     | 1.01 |

---

IV: Social Motives; DV: Blackout

---

| Iteration | PSR  |
|-----------|------|
| 100       | 1.85 |
| 200       | 1.63 |
| 300       | 1.61 |
| 400       | 2.38 |
| 500       | 1.43 |
| 600       | 1.25 |
| 700       | 1.10 |
| 800       | 1.06 |
| 900       | 1.06 |
| 1000      | 1.09 |
| 2000      | 1.68 |
| 4000      | 1.14 |
| 6000      | 1.07 |
| 8000      | 1.05 |
| 10000     | 1.02 |

---

IV: Offered Motives; DV: Number of Consequences

| <b>Iteration</b> | <b>PSR</b> |
|------------------|------------|
| 100              | 1.30       |
| 200              | 1.07       |
| 300              | 1.14       |
| 400              | 1.44       |
| 500              | 1.17       |
| 600              | 1.28       |
| 700              | 1.18       |
| 800              | 1.06       |
| 900              | 1.02       |
| 1000             | 1.09       |
| 2000             | 1.05       |
| 4000             | 1.01       |
| 6000             | 1.02       |
| 8000             | 1.02       |
| 10000            | 1.02       |

IV: Offered Motives; DV: Hangover

| <b>Iteration</b> | <b>PSR</b> |
|------------------|------------|
| 100              | 1.69       |
| 200              | 1.66       |
| 300              | 1.62       |
| 400              | 1.25       |
| 500              | 1.03       |
| 600              | 1.09       |
| 700              | 1.05       |
| 800              | 1.04       |
| 900              | 1.06       |
| 1000             | 1.04       |
| 2000             | 1.04       |
| 4000             | 1.03       |
| 6000             | 1.02       |
| 8000             | 1.02       |
| 10000            | 1.01       |

IV: Offered Motives; DV: Nausea

| <b>Iteration</b> | <b>PSR</b> |
|------------------|------------|
| 100              | 1.85       |
| 200              | 1.45       |
| 300              | 1.46       |
| 400              | 1.28       |
| 500              | 1.05       |
| 600              | 1.05       |
| 700              | 1.10       |
| 800              | 1.07       |
| 900              | 1.02       |
| 1000             | 1.09       |

|       |      |
|-------|------|
| 2000  | 1.17 |
| 4000  | 1.10 |
| 6000  | 1.03 |
| 8000  | 1.01 |
| 10000 | 1.01 |

**IV: Offered Motives; DV: Blackout**

| <b>Iteration</b> | <b>PSR</b> |
|------------------|------------|
| 100              | 1.91       |
| 200              | 1.31       |
| 300              | 1.63       |
| 400              | 2.36       |
| 500              | 1.39       |
| 600              | 1.27       |
| 700              | 1.15       |
| 800              | 1.14       |
| 900              | 1.07       |
| 1000             | 1.13       |
| 2000             | 1.60       |
| 4000             | 1.13       |
| 6000             | 1.07       |
| 8000             | 1.04       |
| 10000            | 1.02       |

**IV: Coping Motives; DV: Number of Consequences**

| <b>Iteration</b> | <b>PSR</b> |
|------------------|------------|
| 100              | 1.30       |
| 200              | 1.07       |
| 300              | 1.14       |
| 400              | 1.44       |
| 500              | 1.18       |
| 600              | 1.28       |
| 700              | 1.19       |
| 800              | 1.06       |
| 900              | 1.02       |
| 1000             | 1.09       |
| 2000             | 1.05       |
| 4000             | 1.01       |
| 6000             | 1.02       |
| 8000             | 1.02       |
| 10000            | 1.02       |

**IV: Coping Motives; DV: Hangover**

| <b>Iteration</b> | <b>PSR</b> |
|------------------|------------|
| 100              | 1.66       |
| 200              | 1.64       |
| 300              | 1.63       |
| 400              | 1.25       |
| 500              | 1.03       |

|       |      |
|-------|------|
| 600   | 1.09 |
| 700   | 1.05 |
| 800   | 1.03 |
| 900   | 1.06 |
| 1000  | 1.04 |
| 2000  | 1.04 |
| 4000  | 1.03 |
| 6000  | 1.02 |
| 8000  | 1.02 |
| 10000 | 1.01 |

IV: Coping Motives; DV: Nausea

| Iteration | PSR  |
|-----------|------|
| 100       | 1.81 |
| 200       | 1.48 |
| 300       | 1.47 |
| 400       | 1.27 |
| 500       | 1.06 |
| 600       | 1.05 |
| 700       | 1.10 |
| 800       | 1.03 |
| 900       | 1.02 |
| 1000      | 1.12 |
| 2000      | 1.16 |
| 4000      | 1.10 |
| 6000      | 1.03 |
| 8000      | 1.01 |
| 10000     | 1.01 |

IV: Coping Motives; DV: Blackout

| Iteration | PSR  |
|-----------|------|
| 100       | 1.88 |
| 200       | 1.30 |
| 300       | 1.61 |
| 400       | 2.25 |
| 500       | 1.37 |
| 600       | 1.24 |
| 700       | 1.11 |
| 800       | 1.07 |
| 900       | 1.06 |
| 1000      | 1.08 |
| 2000      | 1.57 |
| 4000      | 1.16 |
| 6000      | 1.08 |
| 8000      | 1.05 |
| 10000     | 1.02 |

*Note.* PSR factors across 10,000 iterations for each of the multilevel mediation models. PSR values close to 1.0 indicate model convergence (Muthén, 2010).
